# Supplementary material
Source: MDPI journal article supplement (https://www.mdpi.com/2073-4441/14/2/180)

**Table S1.** Geographical Coordinates of Sampling Sites.

| Sampling Stations | Coordinates                 |
|-------------------|-----------------------------|
| S1                | 24°54'36.81"N 91°49'23.96"E |
| S2                | 24°54'26.72"N 91°49'48.62"E |
| S3                | 24°54'13.27"N 91°50'9.56"E  |
| S4                | 24°53'57.62"N 91°50'26.75"E |
| S5                | 24°53'36.60"N 91°50'21.44"E |
| S6                | 24°53'23.44"N 91°50'25.24"E |
| S7                | 24°53'20.36"N 91°50'47.98"E |
| S8                | 24°53'18.64"N 91°51'8.82"E  |
| S9                | 24°53'13.99"N 91°51'32.54"E |
| S10               | 24°53'15.01"N 91°52'3.41"E  |
| S11               | 24°53'5.07"N 91°52'28.08"E  |
| S12               | 24°52'54.63"N 91°52'41.98"E |
| S13               | 24°52'44.50"N 91°53'5.91"E  |
| S14               | 24°52'35.99"N 91°53'43.18"E |
| S15               | 24°52'29.64"N 91°54'9.93"E  |

**Table S2.** AAS conditions during analysis.

| Metals | Flame Type                        | Wave Length | Gas Flow (Liter/min) |
|--------|-----------------------------------|-------------|----------------------|
| Fe     | Air-C <sub>2</sub> H <sub>2</sub> | 248.3       | 1.8 L/min            |
| Zn     | Air-C <sub>2</sub> H <sub>2</sub> | 213.9       | 2.0 L/min            |
| Cu     | Air-C <sub>2</sub> H <sub>2</sub> | 324.8       | 1.8 L/min            |
| Mn     | Air-C <sub>2</sub> H <sub>2</sub> | 279.5       | 2.0 L/min            |
| Ni     | Air-C <sub>2</sub> H <sub>2</sub> | 232.0       | 2.5 L/min            |
| Pb     | Air-C <sub>2</sub> H <sub>2</sub> | 217.0       | 2.0 L/min            |
| Cd     | Air-C <sub>2</sub> H <sub>2</sub> | 228.8       | 1.8 L/min            |

**Table S3.** Metal Concentrations throughout the study area (units in mg/kg).

| Sampling Sites | Cu    | Zn     | Fe      | Mn      | Pb     | Cd    | Ni      |
|----------------|-------|--------|---------|---------|--------|-------|---------|
| S1             | 3.050 | 2.490  | 238.000 | 207.300 | 17.000 | 0.030 | 113.900 |
| S2             | 2.200 | 4.710  | 389.000 | 102.100 | 12.200 | 0.060 | 73.000  |
| S3             | 2.550 | 8.340  | 295.000 | 58.500  | 11.300 | 0.026 | 65.560  |
| S4             | 2.790 | 3.300  | 359.000 | 28.500  | 13.900 | 0.015 | 112.660 |
| S5             | 3.450 | 7.080  | 363.000 | 208.500 | 16.300 | 0.100 | 108.050 |
| S6             | 2.550 | 3.360  | 297.000 | 62.700  | 1.080  | 0.015 | 92.310  |
| S7             | 5.050 | 8.100  | 400.000 | 85.800  | 27.750 | 0.150 | 130.640 |
| S8             | 4.350 | 9.700  | 312.000 | 99.400  | 23.730 | 0.350 | 159.400 |
| S9             | 3.950 | 17.560 | 325.000 | 223.450 | 41.230 | 0.290 | 172.500 |
| S10            | 8.520 | 19.800 | 397.000 | 303.490 | 38.770 | 0.090 | 189.620 |
| S11            | 6.650 | 17.900 | 418.000 | 209.600 | 35.810 | 0.040 | 165.560 |
| S12            | 2.650 | 11.490 | 170.000 | 74.700  | 1.550  | 0.079 | 86.540  |
| S13            | 3.930 | 15.650 | 270.000 | 4.200   | 17.400 | 0.165 | 78.670  |
| S14            | 2.040 | 2.350  | 260.000 | 107.400 | 15.300 | 0.064 | 109.320 |
| S15            | 1.590 | 2.430  | 270.000 | 26.400  | 11.300 | 0.017 | 83.430  |

**Figure S1.** Probability and Cumulative probability of Ecological Risk factor of Ni.

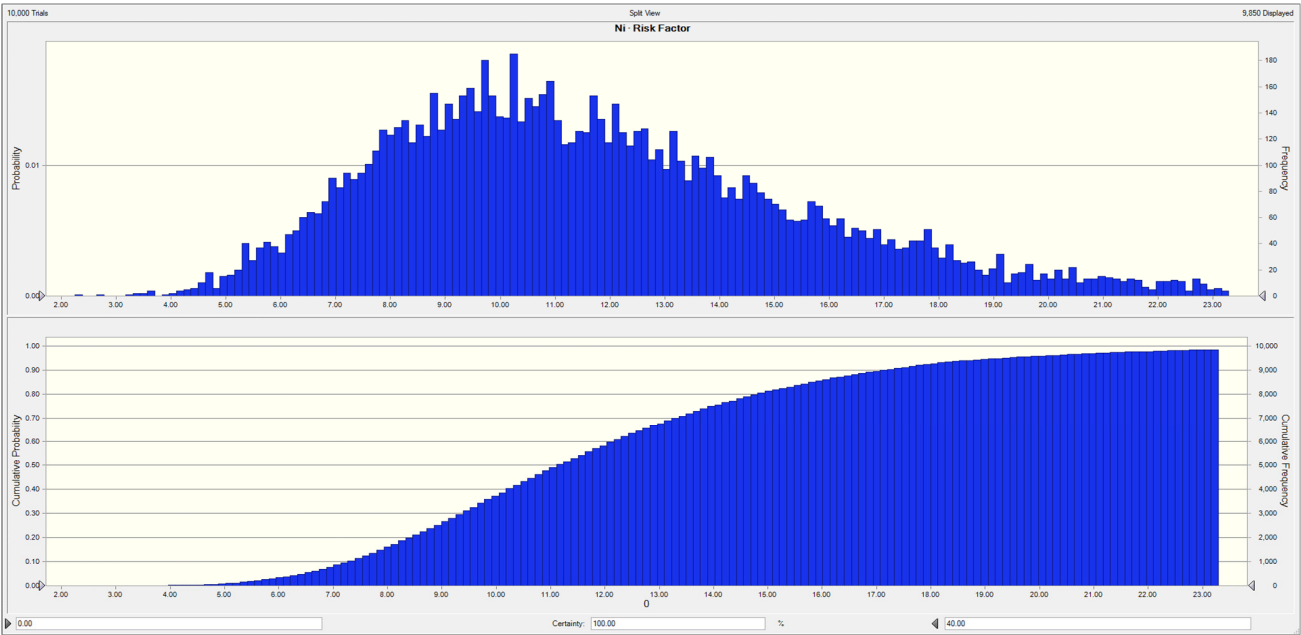

**Figure S2.** Probability and Cumulative probability of Ecological Risk factor of Pb.

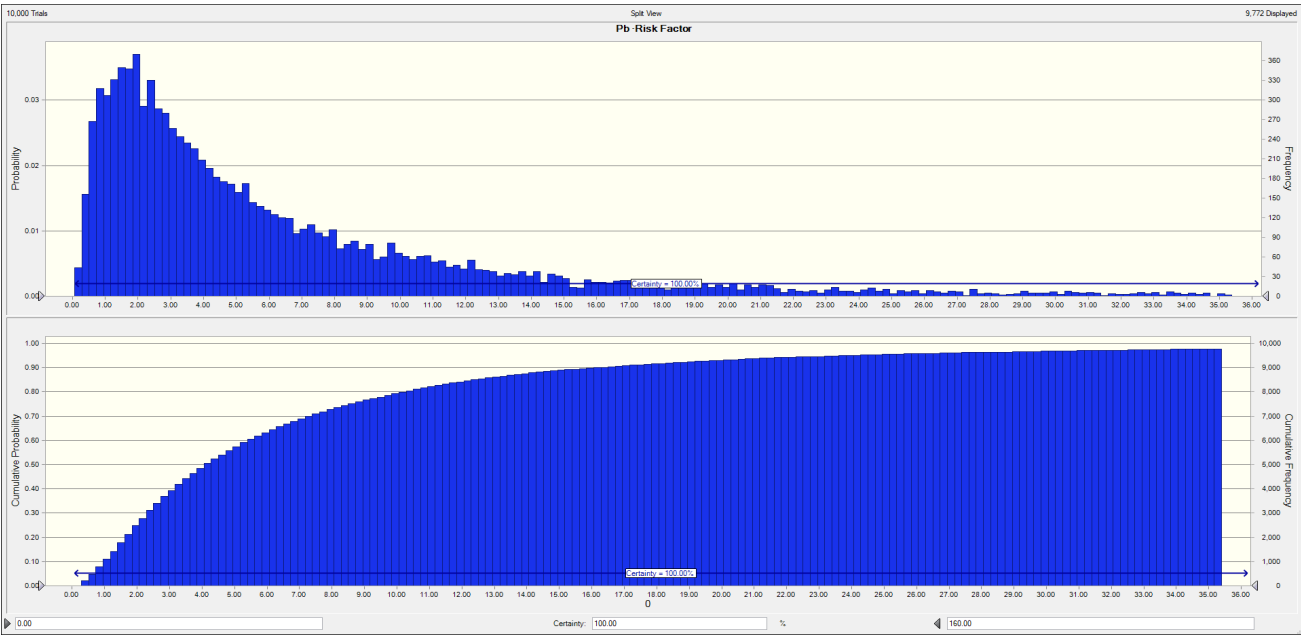

Figure S3. Probability and Cumulative probability of Ecological Risk factor of Cd.

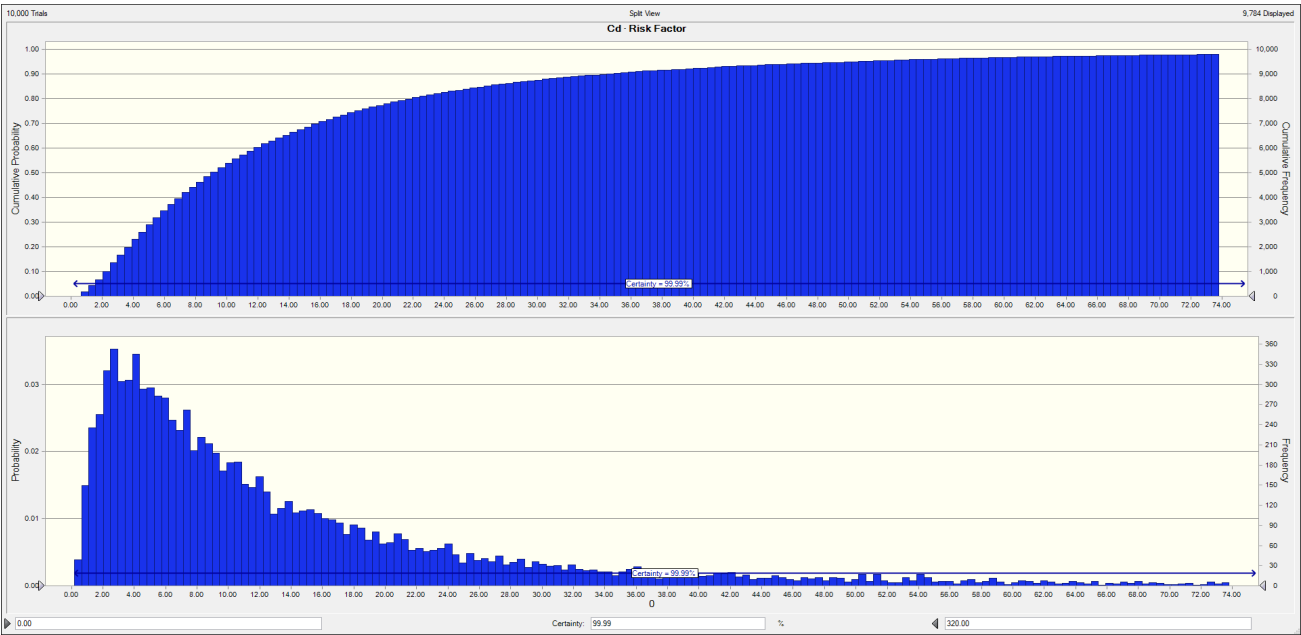

Figure S4. Probability and Cumulative probability of Ecological Risk factor of Zn.

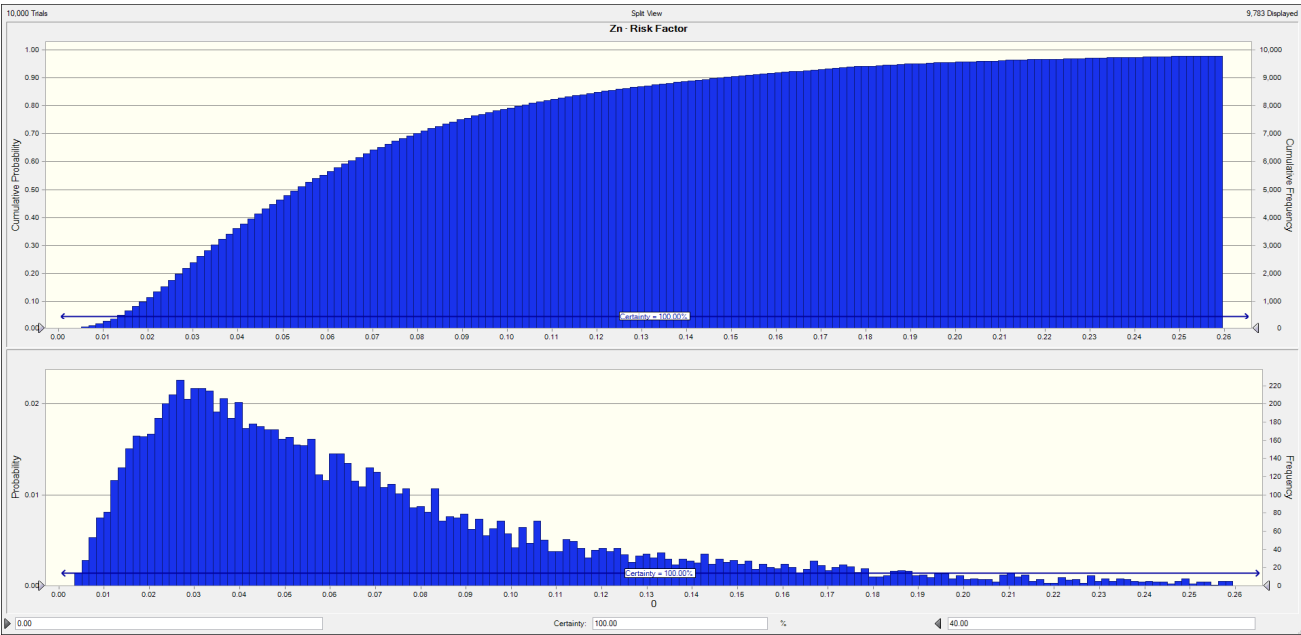

**Figure S5.** Probability and Cumulative probability of Ecological Risk factor of Cu.

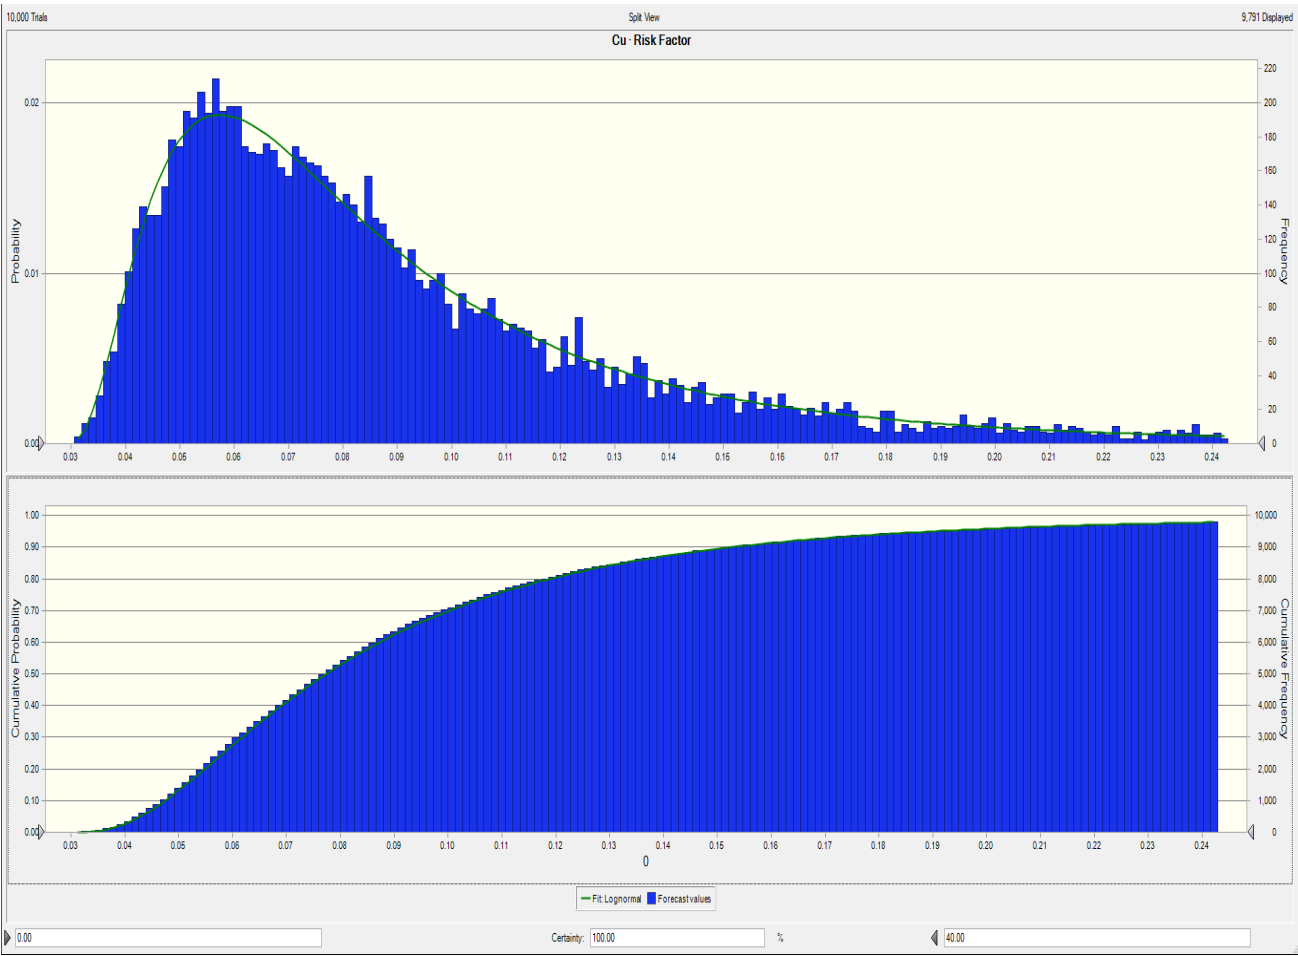

Supplement: s1 [file s1]
